socioeconomic problems, a language barrier, and inferior training. The number of physicians entering the U. S. (about 7,000 each year) is nearly equal to the yearly quota of graduating physicians. Dr. Wilbur's recommendations were: 1. to attract physicians into anesthesia, the specialty should continue to broaden its field of interest and activity and bridge the gap of clinical-applied pharmacology (as recommended by the Dripps Committee) by assuming an active teaching role in all hospitals. 2. To train other manpower, and provide adequate, responsible supervision for non-MD anesthetists who are currently

practicing. He felt that supervision of nurse anesthetists by surgeons and hospital administrators was not in the interest of the best patient care; anesthesia should be unified, not fragmented. Dr. Wilbur felt certain that the associated problems of ethics and economics are soluble.

THOMAS F. HORNBEIN, M.D.  
*Associate Professor  
Departments of Anesthesiology and  
Physiology and Biophysics  
University of Washington  
School of Medicine  
Seattle, Washington*

Mrs. Natale Graziano of Marion, Ohio was the first prize winner in the drawing category at the 1967 Physicians' Art Exhibit at the 1967 Annual Meeting in Las Vegas.

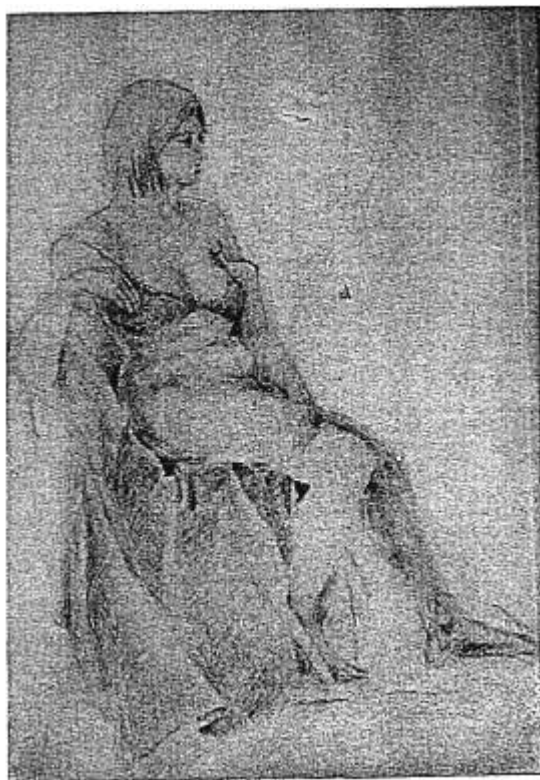

Source: https://asa2.silverchair.com/anesthesiology/article-pdf/29/5/1078/617886/0000542-196809000-00055.pdf
